# Supplementary material for: The Use of Probiotics to Fight Biofilms in Medical Devices: A Systematic Review and Meta-Analysis
Source: PubMed Central journal article supplement (PMC7824608; doi:10.3390/microorganisms9010027), 2020-12-23
Supplement: microorganisms-09-00027-s001.pdf [file microorganisms-09-00027-s001.pdf]

## Supplementary Material

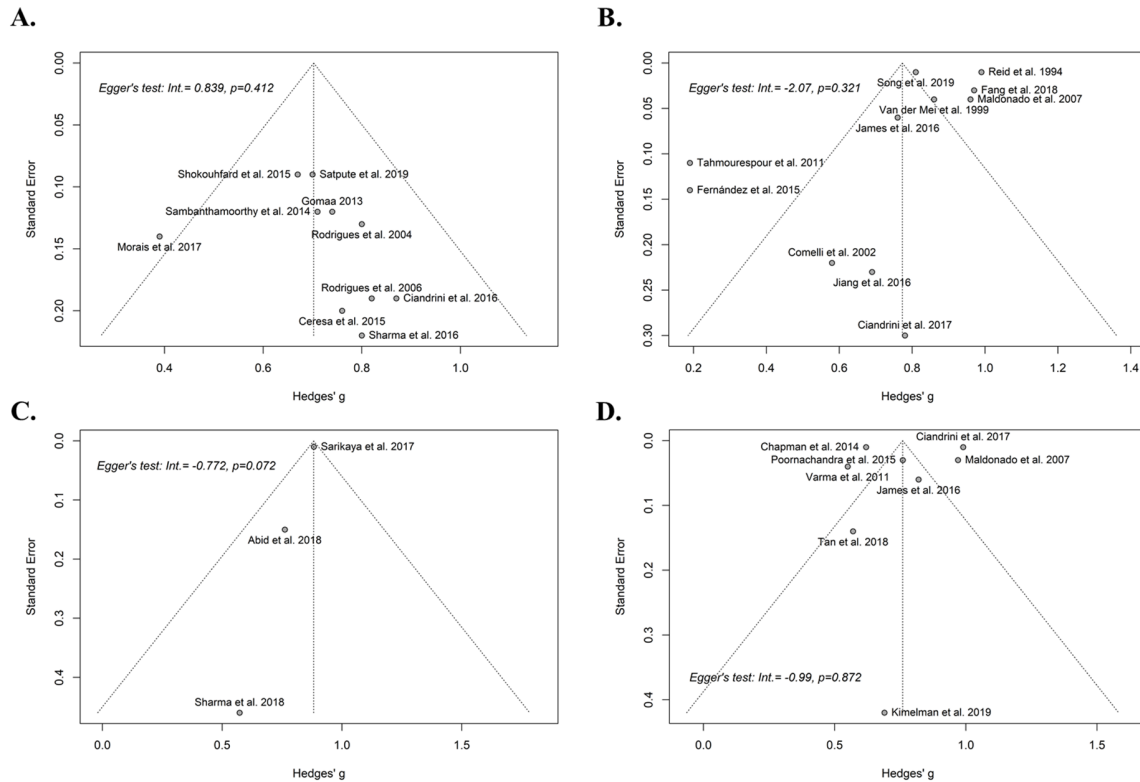

**Figure S1.** Begg's funnel plot for evaluation of the publication bias in the selected studies for the four anti-biofilm substances: (A) biosurfactants, (B) cells, (C) EPS, and (D) cell-free supernatants. The funnel graph plots the Hedges'  $g$  (standard mean of proportion of biofilm reduction) against the standard error. The Egger test for publication bias was not statistically significant for the four represented substances ( $p = 0.412, p = 0.321, p = 0.072, p = 0.875$ , respectively), suggesting that there was no significant publication bias associated with different sample sizes. The dashed line represents Egger's test regression.

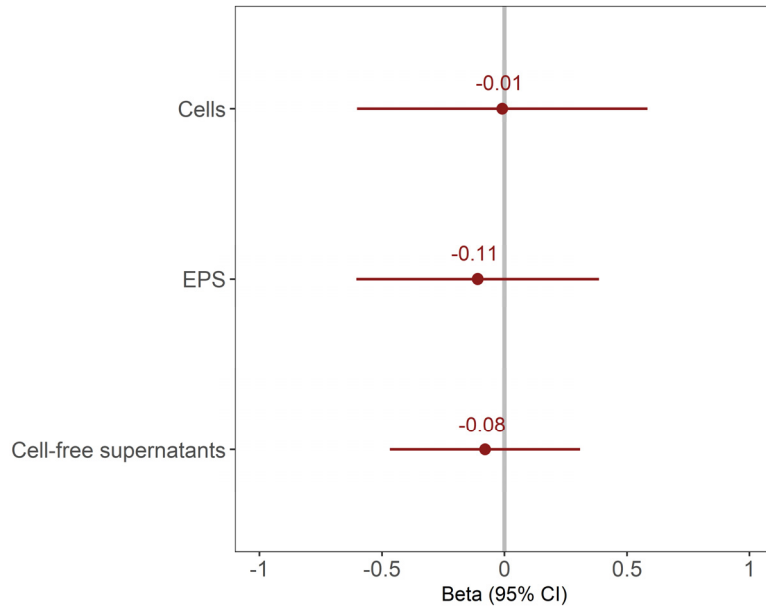

**Figure S2.** Linear regression model between the proportion of biofilm reduction and the type of anti-biofilm substance. Biosurfactants were used as the reference category. Models were adjusted for strategy and the biofilm-forming pathogen.
